# Supplementary material
Source: Springer Nature journal article supplement (https://www.springermedizin.de/resource/supplementary/12865_2013_548_MOESM2_ESM.pdf/9428188)

**Day 0**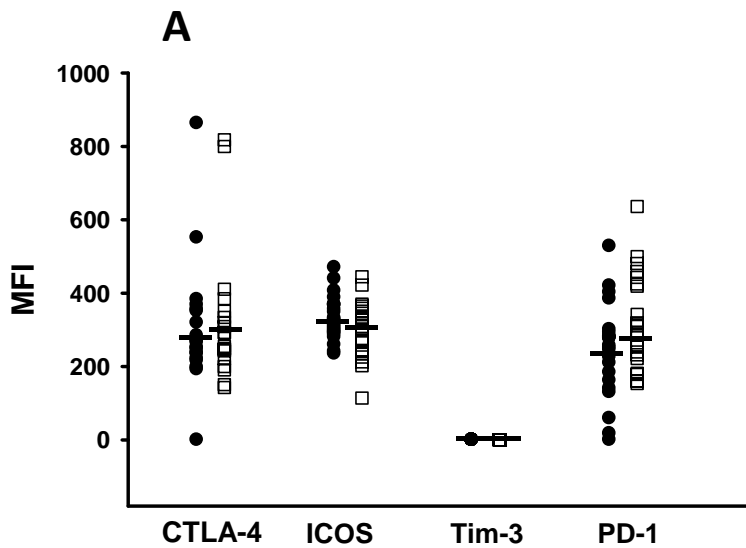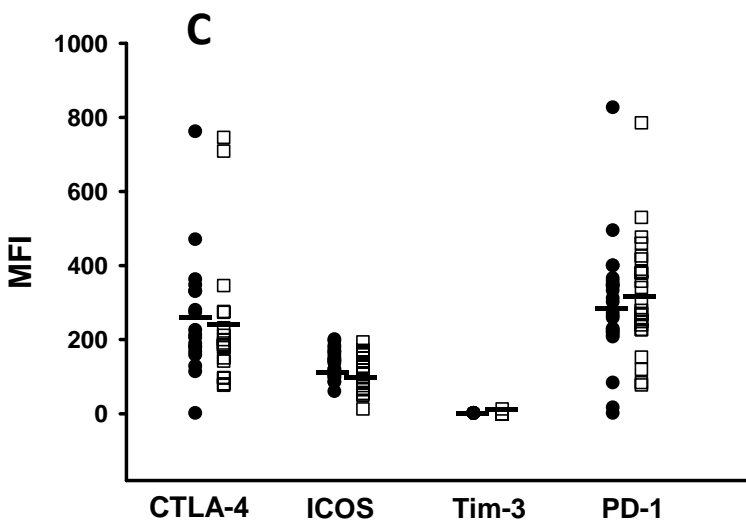**CD4**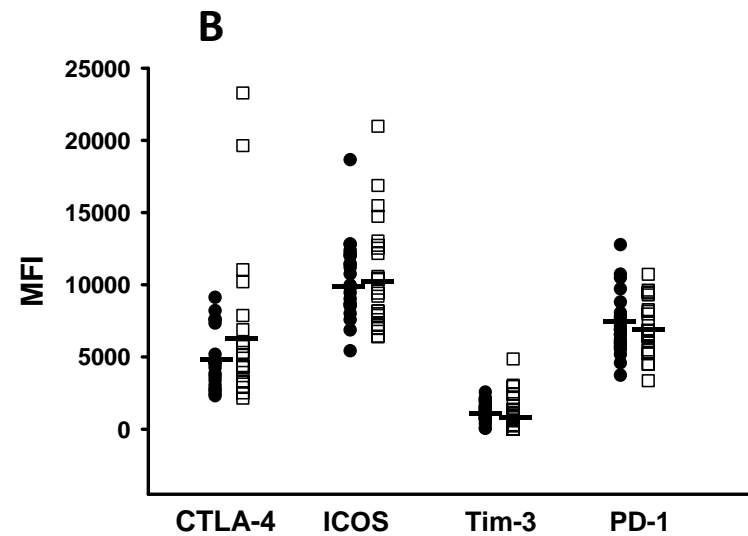**CD8**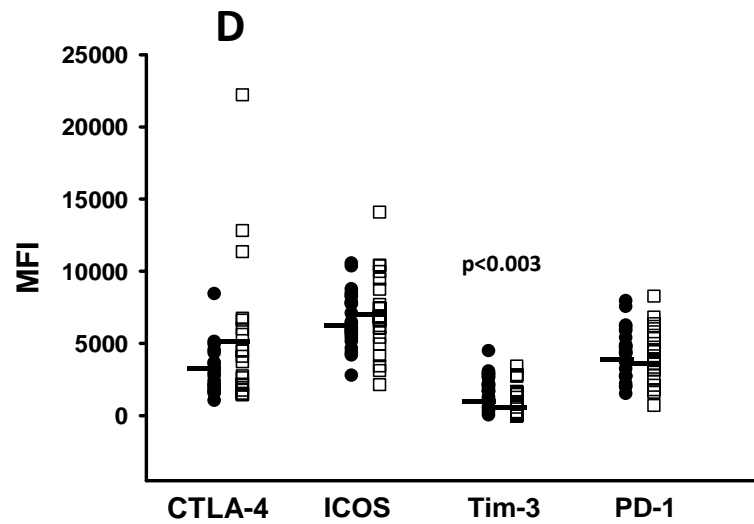● Young  
□ Old

Supplement: MOESM2 [file 9428188]
